# Supplementary material for: Expeditious synthesis of bis-β-cyclodextrinyl-diazacrown-[2]cryptorotaxanes
Source: Royal Society of Chemistry journal article supplement (doi:10.1039/c1cc16171g), 2011-11-10
Supplement: c1cc16171g.pdf [file c1cc16171g.pdf]

## Supporting Information

# Expeditious synthesis of *bis*- $\beta$ -cyclodextrinyl-diazacrown-[2]cryptorotaxanes

Florence Dumarçay-Charbonnier and Alain Marsura\*

*\*SRSMC, Nancy Université & CNRS, Faculté des Sciences et Techniques, B. 70239, F-54506 Vandœuvre-lès-Nancy Cedex, France.  
Fax: +33 (0)3 83 68 23 45; Tel: +33 (0)3 83 68 49 55; E-mail: Alain.Marsura@pharma.uhp-nancy.fr*

## Experimental

### General

1,12-diaminododecane, octadecanedioic acid, sodium tetraphenylboron, tetraphenylphosphonium chloride and diphenyl ethylamine were purchased from Sigma-Aldrich and were used as purchased without further purification.  $^1\text{H}$  NMR (400MHz) and  $^{13}\text{C}$  NMR spectra (100MHz) were recorded on a Bruker DRX 400 FT-NMR spectrometer. Chemical shifts for  $^1\text{H}$ - and  $^{13}\text{C}$ -NMR were reported in parts per million (ppm), calibrated to the residual solvent peak set, with coupling constants reported in Hertz (Hz). High Resolution Electrospray Mass spectra (HR-ESIMS) were recorded on a Bruker Micro QTOF spectrometer. Mass spectrum of **4** was also recorded on a MALDI-TOF-TOF Bruker Daltonics Ultraflex II in positive reflectron mode with 2,5-DHB as matrix. Dialysis was performed on a Spectra/Por Float-A-lyser-MWCO 100-500D.

### Synthesis of the *bis*- $\beta$ -cyclodextrinyl-diazacrown receptor **1**

**1** was synthesized following our recent report <sup>1</sup>.

**Synthesis of pseudorotaxane 3.** 1,12-diaminododecane **2** (0,016g,  $8.00 \cdot 10^{-5}$  mole, 1 equiv.) was added to a solution of 1,10-N,N'-Bis-[cyclomaltoheptaosyl-6A-deoxy-6A-ureido]-4,7,13,16-tetraoxa-1,10-diazacyclooctadecane **1** ( $8.02 \cdot 10^{-5}$  mole, 0.21g) into distilled water (42 mL). The reaction mixture was stirred during 2 days at r.t. until to obtain a clear solution and then was lyophilized. The pseudorotaxane **3** was obtained as a white powder (0,160 g, 72%).  $^1\text{H}$  NMR (400MHz,  $\text{D}_2\text{O}$ ):  $\delta_{\text{H}}$  5.06 (s, H1), 4.00-3.40 (m, H3, H5, H2, H6, H6'), 2.86 (t,  $\alpha\text{-CH}_2$ ,  $J = 7.56$  Hz,  $J = 15,12$  Hz), 1,58 (m,  $\beta\text{-CH}_2$ ), 1.27 (s,  $\text{CH}_2$  centre).  $^{13}\text{C}$  NMR (100MHz,  $\text{D}_2\text{O}$ ):  $\delta_{\text{C}}$  160.7 (NH-CO-NH), 102.3 ( $\text{C}_1$ ), 81.4 ( $\text{C}_4$ ), 73.6-72.3-70.6 ( $\text{C}_2$ ,  $\text{C}_3$ ,  $\text{C}_5$ ), 60.4 ( $\text{C}_6$ ), 39.8 ( $\text{C}_6'$ ), 28.9, 27.6, 26.4, 23.6 ( $\text{CH}_2$  chain). HR-ESIMS calcd. for  $[\text{C}_{110}\text{H}_{192}\text{N}_6\text{O}_{74}]^+$ ,  $[\mathbf{3}] = 2783.1600$ , found 1392,0787  $[\mathbf{3}]^{2+}/2$ .

**Synthesis of [2]cryptorotaxane 4.** A solution of sodium tetraphenylboron (0.06g,  $6.6 \cdot 10^{-5}$  mole, 2.2 equiv.) in distilled water (3mL), was added dropwise to an aqueous solution (3mL) of pseudorotaxane **3** (0.084g,  $3.0 \cdot 10^{-5}$  mole, 1 equiv.). A white precipitate was immediately formed, then centrifugated and washed three time with distilled water. Pure cryptorotaxane **4** was obtained as a white amorphous powder (0.10g, 97%).  $^1\text{H}$  NMR (400MHz,  $\text{DMSO-}d_6$ ):  $\delta_{\text{H}}$  7.17 (s, 16H, arom.), 6.94 (t, 16H, arom.), 6.79 (t, 8H, arom.), 4.84 (s, 14H, H<sub>1</sub>), 4.00-3.10 (m, 122H, H<sub>2</sub>, H<sub>3</sub>, H<sub>4</sub>, H<sub>5</sub>, H<sub>6</sub>, O- $\text{CH}_2$  crown, N- $\text{CH}_2$  crown), 2.75 (t, 4H,  $\alpha\text{-CH}_2$ ,  $J = 7.52$ Hz), 1.49 (s, 4H,  $\beta\text{-CH}_2$ ), 1.25 (s, 24H,  $\text{CH}_2$  diaminododecane alkyl chain).  $^{13}\text{C}$  NMR (100MHz,  $\text{DMSO-}d_6$ ):  $\delta_{\text{C}}$  164.9, 163.9, 163.5, 163.4 ( $\text{C}_q$  arom.), 160.7 (CONH), 136.4, 126.2, 122.4 (CH arom.), 102.3 ( $\text{C}_1$ ), 73.4 ( $\text{C}_4$ ), 72.9 ( $\text{C}_2$ ), 72.8 ( $\text{C}_3$ ), 72.7 ( $\text{C}_5$ ), 70.6 ( $\text{C}_6$ ), 62.5 ( $\text{C}_6'$ ), 29.9, 29.8, 29.7, 29.5 ( $\text{CH}_2$  diaminododecane alkyl chain), 28.0 ( $\alpha\text{-CH}_2$  diaminododecane), 26.7 ( $\beta\text{-CH}_2$ , diaminododecane). HR-ESIMS calcd. for  $[\text{C}_{158}\text{H}_{234}\text{B}_2\text{N}_6\text{O}_{74}]^+$   $[\mathbf{4}] = 3421.4900$ , found 2582.1870  $[\mathbf{4} - \text{C}_{60}\text{H}_{70}\text{B}_2\text{N}_2]^+$ , 1392,0787  $[\mathbf{3}]^{2+}/2$ , 319.1631 $[\text{BPh}_4]$ , 202.2356  $[\text{1,12-diaminododecane}]^+$ .

**Synthesis of pseudorotaxane 6.** Octadecanedioic disodium salt (0.019g,  $6.15 \cdot 10^{-5}$  mole, 1equiv.) was added to a solution of 1,10-N,N'-Bis-[cyclomaltoheptaosyl-6A-deoxy-6A-ureido]-4,7,13,16-tetraoxa-1,10-diazacyclooctadecane **1** (0.16g,  $6.15 \cdot 10^{-5}$  mole, 1equiv.) into distilled water (6 mL). The reaction mixture was stirred during 1h. at r.t. then dialyzed and lyophilized. The pseudorotaxane **6** was obtained as an amorphous white powder (0158g, 97%).  $^1\text{H}$  NMR (400MHz,  $\text{D}_2\text{O}$ ):  $\delta_{\text{H}}$  4.96 (14H, H<sub>1</sub>), 3.98-3.72 (m, 58H, O- $\text{CH}_2$  crown, H<sub>3</sub>, H<sub>6</sub>, H<sub>5</sub>), 3.72-3.30 (m, 64H, H<sub>6</sub>, H<sub>4</sub>, H<sub>2</sub>,

N-CH<sub>2</sub>crown), 2.06-1.84 (m, 10H, α-CH<sub>2</sub>, CH<sub>2</sub> chain), 1.45-1.32 (m, 4H, β-CH<sub>2</sub>), 1.22-0.85 (m, 18H, CH<sub>2</sub> chain). <sup>13</sup>C NMR (100MHz, D<sub>2</sub>O): δ<sub>C</sub> 171.9 (COO<sup>-</sup>), 170.2 (COO<sup>-</sup>), 162.0 (NH-CO NH), 104.9 (C<sub>1</sub>), 88.9 (C<sub>4</sub>), 76.2, 75.4, 74.4 (C<sub>2</sub>, C<sub>3</sub>, C<sub>5</sub>), 72.4 (C<sub>6</sub>), 71.5, 69.7, 67.7 (α-CH<sub>2</sub>, β-CH<sub>2</sub>, CH<sub>2</sub> chain), 62.6 (C<sub>6'</sub>), 51.0 (CH<sub>2</sub> crown), 43.6 (CH<sub>2</sub> crown), 26.2 (CH<sub>2</sub> chain). HR-ESIMS calcd. for [C<sub>116</sub>H<sub>196</sub>N<sub>4</sub>Na<sub>2</sub>O<sub>78</sub>]<sup>+</sup> [6] = 2940.7600, found 1447.0743 [6]<sup>2+</sup>/2; 1313.9470 [6 - C<sub>18</sub>H<sub>32</sub>N<sub>2</sub>O<sub>4</sub>]<sup>2+</sup>/2 + Na<sup>+</sup>; 337.2332 [C<sub>18</sub>H<sub>32</sub>O<sub>4</sub><sup>2-</sup> + Na<sup>+</sup> + 2H<sup>+</sup>].

**Synthesis of [2]cryptorotaxane 7.** An aqueous solution (2mL) of Tetraphenylphosphonium chloride (0.032g, 8.53.10<sup>-5</sup> mole, 2.2 equivs.) was added to a solution of 6 (0.112g, 3.80.10<sup>-5</sup> mole) in 10mL of water. The resulting solution was stirred 1.5 h more at r.t., then dialyzed and lyophilized to give 7 as an amorphous white powder (0.142g, 99%). <sup>1</sup>H NMR (400MHz, DMSO-<sup>6</sup>d): δ<sub>H</sub> 7.98 (m, 8H, arom.), 7.83 (m, 16H, arom.), 7.75 (m, 16H, arom.), 6.16 (s, 2H, NHCONH), 4.84 (s, 14H, H<sub>1</sub>), 3.85-3.00 (m, 122H, H<sub>2</sub>, H<sub>3</sub>, H<sub>4</sub>, H<sub>5</sub>, H<sub>6</sub>, O-CH<sub>2</sub> crown, N-CH<sub>2</sub> crown), 2.04 (s, 4H, α-CH<sub>2</sub> diacide chain), 1.77 (s, 4H, β-CH<sub>2</sub> diacide chain), 1.23 (s large, 24H, CH<sub>2</sub> centre diacide alkyl chain). <sup>13</sup>C NMR (100MHz, DMSO-<sup>6</sup>d): δ<sub>C</sub> 174.3, 170.7 (COO<sup>-</sup>), 158.0 (NHCONH), 135.3, 134.5, 130.5, 118.1, 117.2 (CH arom.), 101.9 (C<sub>1</sub>), 81.6 (C<sub>4</sub>), 73.0, 72.4, 71.9 (C<sub>2</sub>, C<sub>3</sub>, C<sub>5</sub>), 70.1 (C<sub>6</sub>), 59.8 (C<sub>6'</sub>), 48.0 (CH<sub>2</sub> crown), 40.4 (CH<sub>2</sub> crown), 23.3 (β-CH<sub>2</sub> dicarboxylic chain), 20.5 (α-CH<sub>2</sub> dicarboxylic chain) □ HR-ESIMS calcd. for [C<sub>164</sub>H<sub>236</sub>N<sub>4</sub>O<sub>78</sub>P<sub>2</sub>]<sup>+</sup> [7] = 3571.4100, found 1447.0743 [7 - C<sub>24</sub>H<sub>20</sub>P<sup>+</sup>]<sup>2+</sup>/2, 339.1301 [C<sub>24</sub>H<sub>20</sub>P<sup>+</sup>].

**Synthesis of [2]cryptorotaxane 8.** 2,2-Diphenylethylammonium chloride (0.0073g, 3.7.10<sup>-5</sup> mole, 2.2equivs.) were added to a solution of pseudorotaxane 6 (0.050g, 1.7.10<sup>-5</sup> mole), in water (3mL). The resulting solution was stirred 1h. more at r.t. under argon, then dialyzed and lyophilized to give 8 as an amorphous white powder (0.020g, 37%). <sup>1</sup>H NMR (400MHz, D<sub>2</sub>O): δ<sub>H</sub> 7.40-7.21 (m, 10H, arom.), 5.37-5.34 (br m, 2H, NH), 5.02 (s, 14H, H<sub>1</sub>), 4.12 (t, 2H, J = 8Hz, CH amine), 3.95-3.32 (m, complex 126H, H<sub>2</sub>, H<sub>3</sub>, H<sub>4</sub>, H<sub>5</sub>, O-CH<sub>2</sub> crown, N-CH<sub>2</sub> crown, N-CH<sub>2</sub> diphenylethylammonium), 2.16 (s, 4H, α-CH<sub>2</sub> dicarboxylic chain), 1.55 (s, 4H, β-CH<sub>2</sub> dicarboxylic chain), 1.36-1.08 (m, 24H, CH<sub>2</sub> centre dicarboxylic alkyl chain). <sup>13</sup>C NMR (100MHz, D<sub>2</sub>O): δ<sub>C</sub> 160.3 (NCONH), 129.0, 127.6, 125.4 (CH arom.), 102.0 (C<sub>1</sub>), 80.6 (C<sub>4</sub>), 73.3, 72.1, 70.3 (C<sub>2</sub>, C<sub>3</sub>, C<sub>5</sub>), 60.5, 59.7 (C<sub>6</sub>, C<sub>6'</sub>), 52.0 (CH diphenylethylammonium), 49.5 (CH<sub>2</sub> crown), 44.8 (CH<sub>2</sub> crown), 37.7 (α-CH<sub>2</sub> dicarboxylic chain), 28.6 (β-CH<sub>2</sub> dicarboxylic chain) 26.0 (CH<sub>2</sub> centre dicarboxylic alkyl chain). HR-ESIMS calcd. for [C<sub>144</sub>H<sub>228</sub>N<sub>6</sub>O<sub>78</sub>]<sup>+</sup> [8] = 3289.4100, found 1447.0657 [6]<sup>2+</sup>/2, 1313.9504 [6 - C<sub>18</sub>H<sub>32</sub>N<sub>2</sub>O<sub>4</sub>]<sup>2+</sup>/2 + Na<sup>+</sup>, 337.2332 [C<sub>18</sub>H<sub>32</sub>O<sub>4</sub><sup>2-</sup> + Na<sup>+</sup> + 2H<sup>+</sup>], 198.1291 [C<sub>14</sub>H<sub>16</sub>N]<sup>+</sup>.

Fig. 1S : Job plot for 1 with 1,12-diaminododecane 2 and octadecanedioic acid 5.

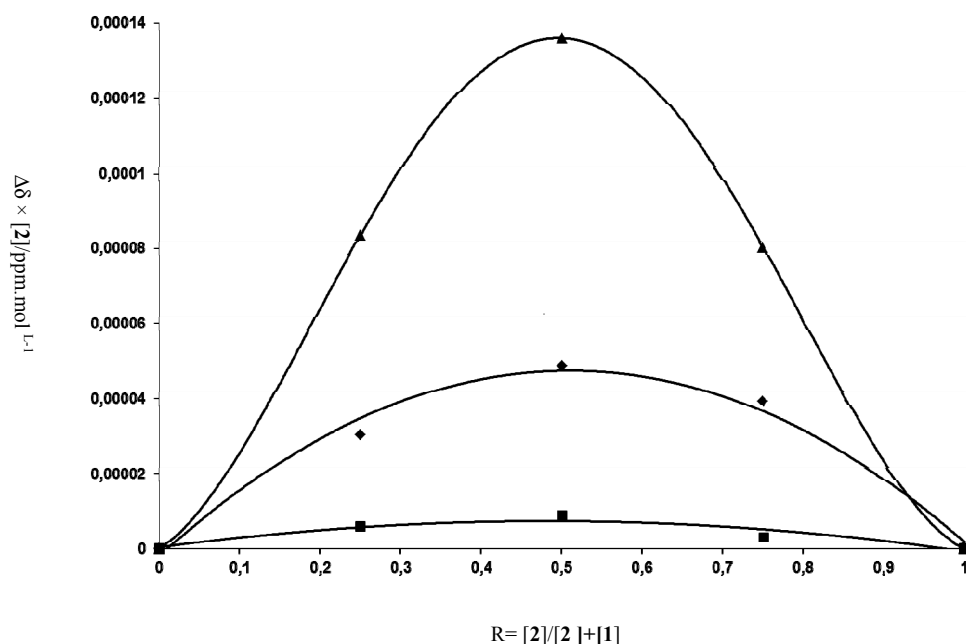

Fig. A. Job plot corresponding to the CIS of the methylene protons of the 1,12-diaminododecane chain for [1/2] in D<sub>2</sub>O at 300K. ■ α-methylene protons; ◆ β-methylene protons; ▲ methylene protons of the centre of alkyl chain.

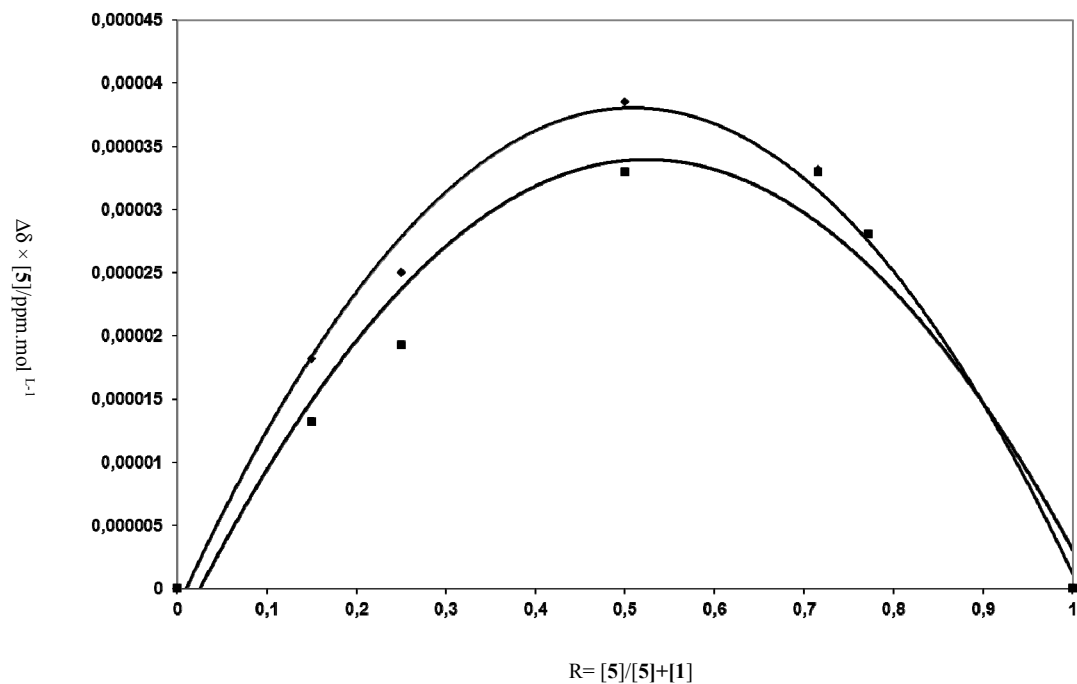

Fig. B. Job plot corresponding to the CIS of the methylene protons of the octadecanedioic acid chain for [1/5] in  $D_2O$  at 300K. ■  $\alpha$ -methylene protons; ◆  $\beta$ -methylene protons; ▲ methylene protons of the centre of alkyl chain.

Fig. 2S: 2D ROESY NMR spectrum of the pseudorotaxane **6** in  $D_2O$ .

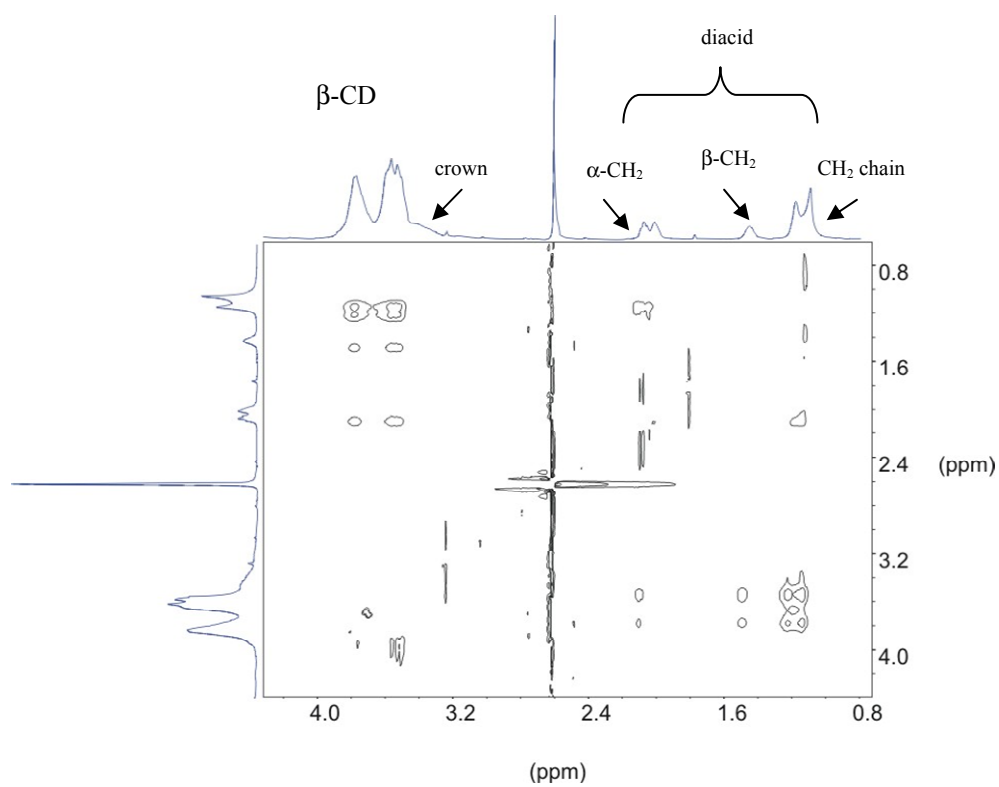

Fig. 3S: 2D ROESY NMR spectrum of the pseudorotaxane **3** in D<sub>2</sub>O.

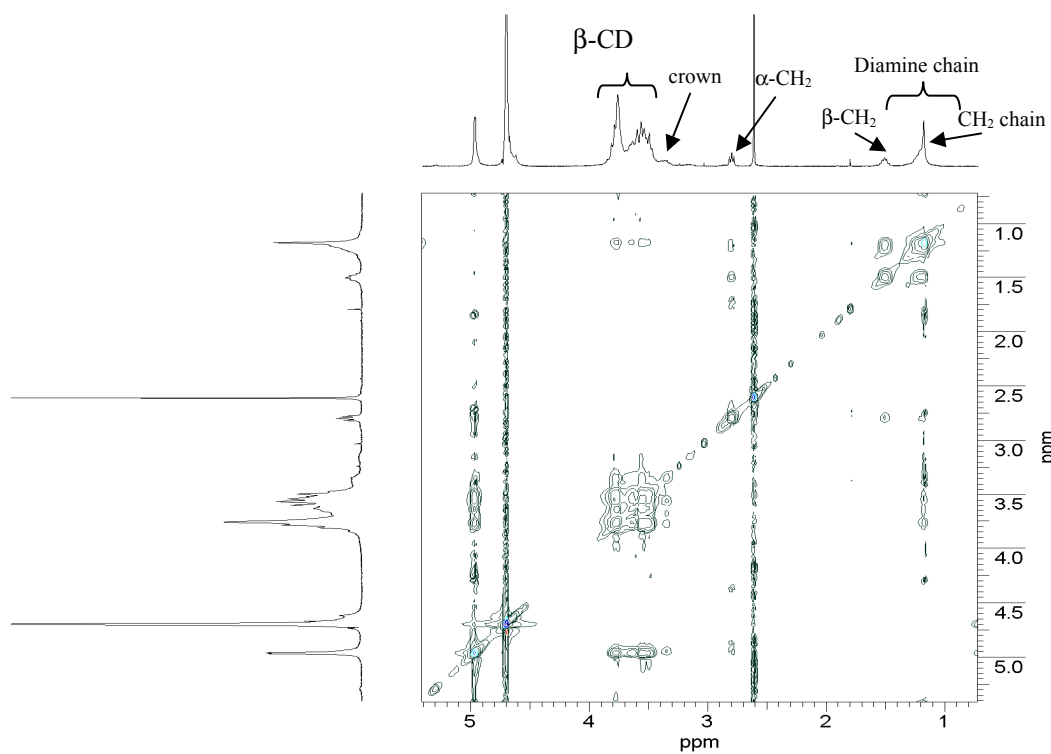

Fig. 4S: 2D ROESY NMR spectrum of the [2]cryptorotaxane **8** in D<sub>2</sub>O. Cross peaks between dicarboxylic chain, diphenylethylamine and CD cavities are indicated by arrows.

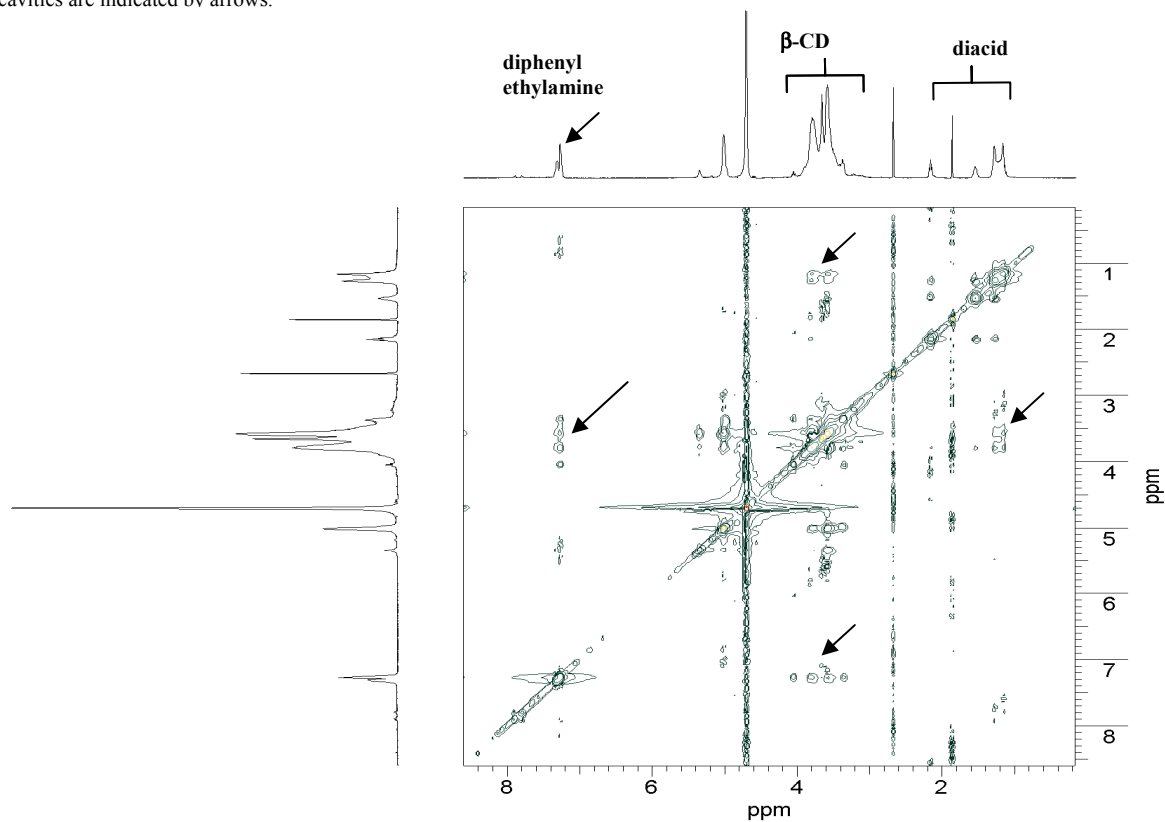

Fig. 5s. Zoom of 2D ROESY NMR spectra of the pseudorotaxanes in D<sub>2</sub>O: a) **3** and b) **6**.

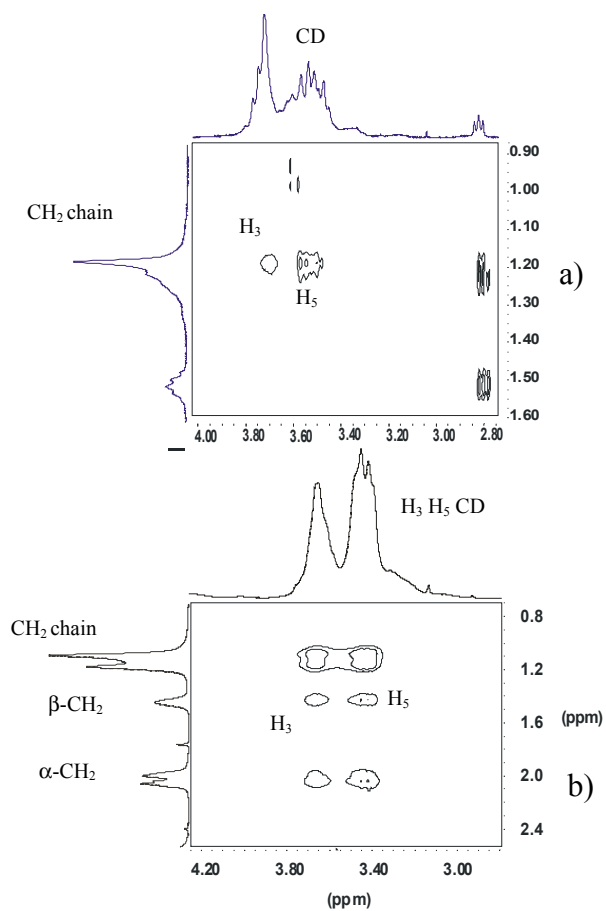

Fig. 6S: 2D ROESY NMR spectrum of the [2]cryptorotaxane **4** in DMSO-<sup>6</sup>d.

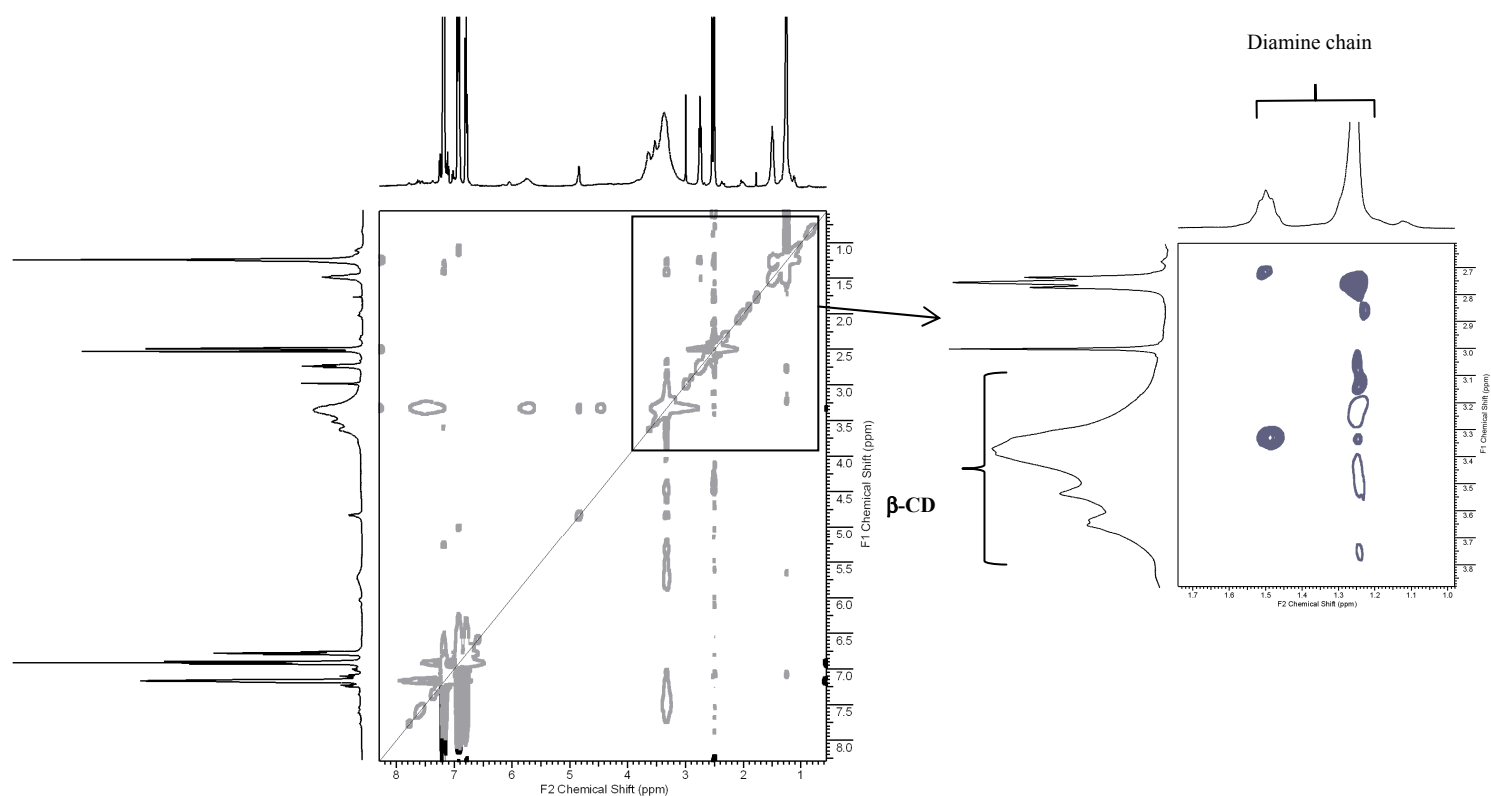

Fig.7S : 2D ROESY NMR spectrum of the [2]cryptorotaxane **7** in DMSO- $d_6$ .

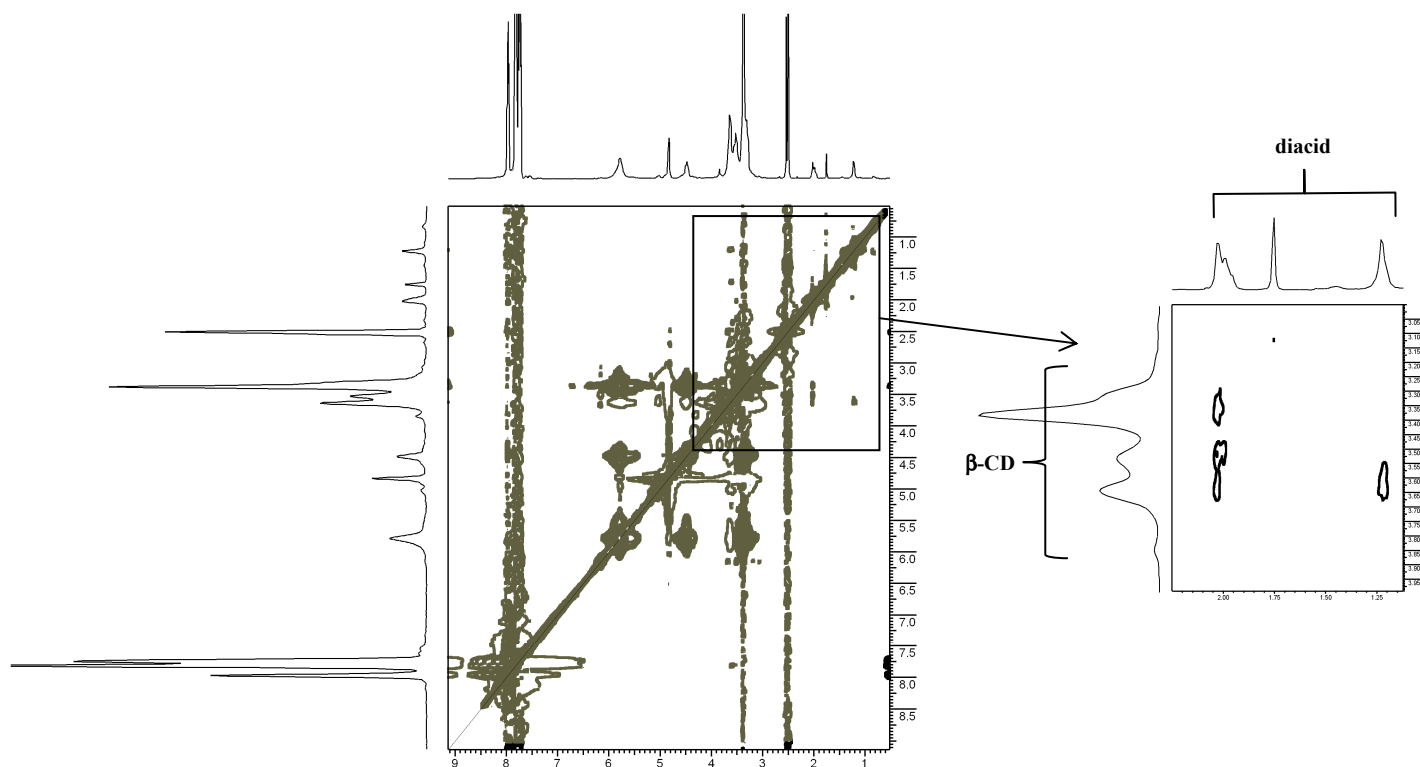

**References :**

- (1). S. Manuel, J.-P. Joly, B. Courcot, J. Elysée, N.-E. Ghermani, and Alain Marsura, *Tetrahedron*, 2007, **63**, 1706-1714
